# Supplementary material for: The Mediating and Moderating Effects of Physical Fitness of the Relationship between Adherence to the Mediterranean Diet and Health-Related Quality of Life in University Students
Source: Nutrients. 2020 Nov 22;12(11):3578. doi: 10.3390/nu12113578 (PMC7700278; doi:10.3390/nu12113578)
Supplement: Supplementary file 1 [file nutrients-12-03578-s001.pdf]

## Supplementary material

**Table S1.** ANCOVA models comparing the means of physical HRQoL (PCS), mental HRQoL (MCS), and total MEDAS-14 scores according to categories of CRF and handgrip strength.

|                    | CRF (VO <sub>2</sub> max estimate, ml/Kg/min) |                       |          |                  |                 | Handgrip strength (Kg) |                       |          |                  |                 |
|--------------------|-----------------------------------------------|-----------------------|----------|------------------|-----------------|------------------------|-----------------------|----------|------------------|-----------------|
|                    | Low                                           | Medium                | High     | P                | ES <sup>d</sup> | Low                    | Medium                | High     | p                | ES <sup>d</sup> |
| n                  | 83                                            | 195                   | 82       |                  |                 | 88                     | 181                   | 91       |                  |                 |
| <b>PCS</b>         |                                               |                       |          |                  |                 |                        |                       |          |                  |                 |
| Model 0            | 53.3±6.6 <sup>a</sup>                         | 55.0±5.2              | 55.3±4.6 | <b>0.005</b>     | 0.02            | 55.1±4.7               | 54.4±5.9              | 54.4±5.3 | 0.458            | 0.004           |
| Model 1            | 52.8±6.0 <sup>a,c</sup>                       | 55.0±5.2              | 55.7±4.5 | <b>0.004</b>     | 0.03            | 55.5±4.3               | 54.5±5.9              | 54.1±5.2 | 0.317            | 0.001           |
| <b>MCS</b>         |                                               |                       |          |                  |                 |                        |                       |          |                  |                 |
| Model 0            | 38.6±7.1 <sup>c</sup>                         | 39.1±6.1 <sup>b</sup> | 42.7±5.6 | <b>&lt;0.001</b> | 0.08            | 38.1±6.8 <sup>a</sup>  | 39.3±6.1 <sup>b</sup> | 42.9±6.3 | <b>&lt;0.001</b> | 0.08            |
| Model 1            | 39.2±7.2 <sup>c</sup>                         | 39.3±6.3 <sup>b</sup> | 41.7±6.2 | <b>0.044</b>     | 0.01            | 38.7±6.8               | 39.4±6.2              | 41.2±6.4 | <b>0.040</b>     | 0.02            |
| <b>Total MEDAS</b> |                                               |                       |          |                  |                 |                        |                       |          |                  |                 |
| Model 0            | 6.7±2.0 <sup>a</sup>                          | 6.9±2.1               | 7.5±2.1  | <b>0.033</b>     | 0.02            | 6.7±1.9 <sup>a</sup>   | 7.0±2.1               | 7.5±2.2  | <b>0.034</b>     | 0.02            |
| Model 1            | 6.7±2.0                                       | 6.8±2.0               | 7.5±2.1  | 0.078            | 0.01            | 6.7±2.0 <sup>a</sup>   | 6.9±2.1               | 7.5±2.2  | 0.158            | 0.01            |

Values are marginal estimated means ± SD. Bold values indicate statistical significance  $p \leq 0.05$ . Abbreviation: CRF, cardiorespiratory fitness; ES; effect size (partial eta-squared); PCS, physical component summary; MCS, mental component summary. Categories of CRF, and handgrip strength are: Low (representing 1st quartile), Medium (2nd and 3rd quartiles), and high (4th quartile). Superscript letters indicate statistical significance ( $P < 0.05$ ) in pairwise mean comparisons using Bonferroni post-hoc test: <sup>a</sup>low < high, <sup>b</sup>medium < high, <sup>c</sup>low < medium. Model 0 Crude data; Model 1 Adjusted for age + sex + socioeconomic level. <sup>d</sup>The size of the effect was categorized as small (0.01), moderate (0.06) or large (0.14) as classified by Cohen, 1988.

**Table S2.** ANCOVA models comparing the means of the PCS and the MCS with the MEDAS-14 items categories after controlling for CRF and handgrip strength.

|            | Adherence to the MD |                |              |                 |
|------------|---------------------|----------------|--------------|-----------------|
|            | Low adherence       | Good adherence | p            | ES <sup>a</sup> |
| n          | 234                 | 126            |              |                 |
| <b>PCS</b> |                     |                |              |                 |
| Model 0    | 54.7±5.4            | 54.6±5.1       | 0.870        | 0.001           |
| Model 1    | 54.7±5.0            | 54.6±5.0       | 0.944        | 0.001           |
| Model 2    | 55.3±5.6            | 55.7±5.1       | 0.669        | 0.001           |
| Model 3    | 55.1±4.9            | 55.3±5.0       | 0.714        | 0.001           |
| <b>MCS</b> |                     |                |              |                 |
| Model 0    | 39.2±6.7            | 41.3±5.7       | <b>0.006</b> | 0.021           |
| Model 1    | 39.5±6.6            | 40.9±5.8       | <b>0.031</b> | 0.013           |
| Model 2    | 39.3±6.8            | 40.9±6.0       | 0.054        | 0.011           |
| Model 3    | 39.3±5.9            | 40.9±6.8       | 0.087        | 0.012           |

Values are marginal estimated means ± SD. Bold values indicate statistical significance  $P \leq 0.05$ . Abbreviations: ES; effect size (partial eta-squared); PCS, physical component summary; MCS, mental component summary. Low adherence = total score < 9 on the MEDAS-14 items questionnaire; good adherence = total score  $\geq 9$  on the MEDAS-14 items questionnaire. Model 0: Crude data; Model 1: Age + sex + socioeconomic level. ; Model 2: Model 1 + CRF; Model 3: Model 1 + handgrip strength. <sup>a</sup>The size of the effect was categorized as small (0.01), moderate (0.06) or large (0.14) as classified by Cohen, 1988.

**A)**

**B)**

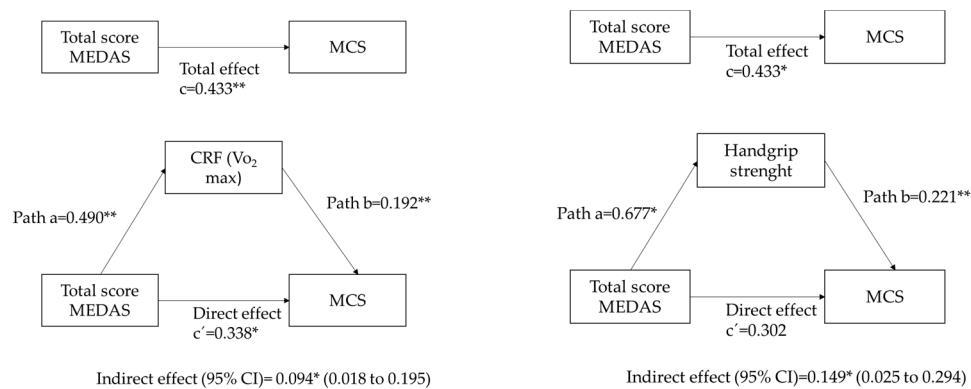

**Figure S2.** A) CRF Vo<sub>2</sub> max estimate and B) handgrip strength mediation models of the relationship between the total MEDAS score and mental HRQoL (MCS). \* $p \leq 0.05$ ; \*\* $p < 0.001$ .
